# Supplementary material
Source: publisher site journal article supplement (https://www.spandidos-publications.com/7060/downloadSupplementary)
Supplement: Supplementary file 1 [file downloadSupplementary]

## Sheet: Linked Pathways
Table SIII. Linked pathways for proteins and metabolites.
protein								metabolism
KEGG	KEGG pathway	Fisher's exact test p value	Mapping	Fold enrichment				POS											NEG
map00020	hsa00020 Citrate cycle (TCA cycle)	0.171661	2	2.66				MapID	MapTitle	Pvalue	x	y	n	N	EnrichDirect	MetaIDs	kegg_cpd_id		MapID	MapTitle	Pvalue	x	y	n	N	EnrichDirect	MetaIDs	kegg_cpd_id
map00062	hsa00062 Fatty acid elongation	0.0601822	2	4.91				map05200	Pathways in cancer	0.0110921	3	4	9	56	Over	Cortisone; Androstenedione; Cortisol	cpd:C00762,cpd:C00280,cpd:C00735		map01040	Biosynthesis of unsaturated fatty acids	0.00889115	8	11	16	44	Over	Docosahexaenoic acid; Arachidic Acid; Nervonic acid; Adrenic acid; Palmitic acid; Arachidonic acid; Stearic acid; Eicosapentaenoic acid	cpd:C06429,cpd:C06425,cpd:C08323,cpd:C16527,cpd:C00249,cpd:C00219,cpd:C01530,cpd:C06428
map00071	hsa00071 Fatty acid degradation	0.592426	1	1.14				map05215	Prostate cancer	0.0110921	3	4	9	56	Over	Cortisone; Androstenedione; Cortisol	cpd:C00762,cpd:C00280,cpd:C00735		map00020	Citrate cycle (TCA cycle)	0.12685	2	2	16	44	Over	Citric acid; L-Malate	cpd:C00158,cpd:C00149
map00250	hsa00250 Alanine, aspartate and glutamate metabolism	0.400153	1	2				map04960	Aldosterone-regulated sodium reabsorption	0.0640693	2	3	9	56	Over	Cortisone; Cortisol	cpd:C00762,cpd:C00735		map04216	Ferroptosis	0.12685	2	2	16	44	Over	Adrenic acid; Arachidonic acid	cpd:C16527,cpd:C00219
map00330	hsa00330 Arginine and proline metabolism	0.536252	1	1.33				map04917	Prolactin signaling pathway	0.160714	1	1	9	56	Over	Androstenedione	cpd:C00280		map00062	Fatty acid elongation	0.363636	1	1	16	44	Over	Palmitic acid	cpd:C00249
map00480	hsa00480 Glutathione metabolism	0.630118	1	1.03				map05020	Prion diseases	0.160714	1	1	9	56	Over	Corticosterone	cpd:C02140		map00071	Fatty acid degradation	0.363636	1	1	16	44	Over	Palmitic acid	cpd:C00249
map01040	hsa01040 Biosynthesis of unsaturated fatty acids	0.295916	1	2.9				map01522	Endocrine resistance	0.298052	1	2	9	56	Over	Androstenedione	cpd:C00280		map00250	Alanine, aspartate and glutamate metabolism	0.363636	1	1	16	44	Over	Citric acid	cpd:C00158
map01522	hsa01522 Endocrine resistance	0.138439	2	3.04				map04925	Aldosterone synthesis and secretion	0.415043	1	3	9	56	Over	Corticosterone	cpd:C02140		map00480	Glutathione metabolism	0.363636	1	1	16	44	Over	Dehydroascorbic acid	cpd:C05422
map02010	hsa02010 ABC transporters	0.173949	1	5.32				map04934	Cushing's syndrome	0.514376	1	4	9	56	Over	Cortisol	cpd:C00735		map04217	Necroptosis	0.363636	1	1	16	44	Over	Arachidonic acid	cpd:C00219
map04216	hsa04216 Ferroptosis	0.455256	1	1.68				map00330	Arginine and proline metabolism	1	1	5	9	56	Over	Creatinine	cpd:C00791		map04270	Vascular smooth muscle contraction	0.363636	1	1	16	44	Over	Arachidonic acid	cpd:C00219
map04217	hsa04217 Necroptosis	0.392705	2	1.49															map04664	Fc epsilon RI signaling pathway	0.363636	1	1	16	44	Over	Arachidonic acid	cpd:C00219
map04270	hsa04270 Vascular smooth muscle contraction	0.685473	1	0.89															map04666	Fc gamma R-mediated phagocytosis	0.363636	1	1	16	44	Over	Arachidonic acid	cpd:C00219
map04611	hsa04611 Platelet activation	0.794113	1	0.65															map04730	Long-term depression	0.363636	1	1	16	44	Over	Arachidonic acid	cpd:C00219
map04664	hsa04664 Fc epsilon RI signaling pathway	0.0872513	2	3.99															map04912	GnRH signaling pathway	0.363636	1	1	16	44	Over	Arachidonic acid	cpd:C00219
map04666	hsa04666 Fc gamma R-mediated phagocytosis	0.30013	2	1.83															map04925	Aldosterone synthesis and secretion	0.363636	1	1	16	44	Over	Arachidonic acid	cpd:C00219
map04723	hsa04723 Retrograde endocannabinoid signaling	0.780197	1	0.68															map02010	ABC transporters	1	1	2	16	44	Over	Taurine	cpd:C00245
map04730	hsa04730 Long-term depression	0.472495	1	1.6															map04611	Platelet activation	1	1	2	16	44	Over	Arachidonic acid	cpd:C00219
map04750	hsa04750 Inflammatory mediator regulation of TRP channels	0.455256	1	1.68															map04723	Retrograde endocannabinoid signaling	1	1	2	16	44	Over	Arachidonic acid	cpd:C00219
map04912	hsa04912 GnRH signaling pathway	0.0597055	3	3.3															map04750	Inflammatory mediator regulation of TRP channels	1	1	2	16	44	Over	Arachidonic acid	cpd:C00219
map04917	hsa04917 Prolactin signaling pathway	0.0688335	2	4.56
map04925	hsa04925 Aldosterone synthesis and secretion	0.419103	1	1.88
map04934	hsa04934 Cushing syndrome	0.194493	2	2.46
map04960	hsa04960 Aldosterone-regulated sodium reabsorption	0.249412	1	3.55
map05020	hsa05020 Prion disease	0.922414	2	0.5
map05200	hsa05200 Pathways in cancer	0.656488	3	0.9
map05215	hsa05215 Prostate cancer	0.12772	2	3.19

## Sheet: protein
KEGG pathway	Fisher's exact test P-value	Mapping	Fold enrichment	Protein accession no.	Protein description	Ratio	Regulation	P-value	Gene	KEGG category	Molecular weight, kDa	Score	Coverage, %	Peptides	PSMs	Unique peptides	A1	A3	A2	B1	B2	B3
hsa04216 Ferroptosis	0.455256	1	1.68	P08195	4F2 cell-surface antigen heavy chain	0.541	Down	0.013421	SLC3A2	K06519	67.993	5.0763	2.1	1	1	1	0.938	0.613	0.652	1.22	1.534	1.32
hsa00330 Arginine and proline metabolism	0.536252	1	1.33	P12532	Creatine kinase U-type, mitochondrial	0.594	Down	0.048599	CKMT1A	K00933	47.036	101.42	24.7	7	9	7	0.993	0.627	0.617	1.003	1.447	1.319
hsa02010 ABC transporters	0.173949	1	5.32	Q03518	Antigen peptide transporter 1	0.676	Down	0.039784	TAP1	K05653	87.217	16.673	3.2	2	2	2	0.859	0.799	0.922	1.576	1.18	1.058
hsa04217 Necroptosis	0.392705	2	1.49	Q7LBR1	Charged multivesicular body protein 1b	0.749	Down	0.0191174	CHMP1B	K12197	22.109	2.6261	4.5	1	1	1	1.03	0.895	0.794	1.183	1.192	1.255
hsa00250 Alanine, aspartate and glutamate metabolism	0.400153	1	2	P30520	Adenylosuccinate synthetase isozyme 2	0.764	Down	0.031478	ADSS2	K01939	50.097	2.2432	2.9	1	2	1	1.017	0.94	0.813	1.335	1.167	1.126
hsa00020 Citrate cycle (TCA cycle)	0.171661	2	2.66	P53396	ATP-citrate synthase	0.79	Down	0.049916	ACLY	K01648	120.84	68.441	13.5	11	11	11	0.943	0.906	0.903	1.101	1.35	1.031
hsa00062 Fatty acid elongation	0.0601822	2	4.91	Q9P035	Very-long-chain (3R)-3-hydroxyacyl-CoA dehydratase 3	0.805	Down	0.0084358	HACD3	K10703	43.159	14.841	15.7	4	4	4	0.89	1.022	0.9	1.157	1.185	1.151
hsa01040 Biosynthesis of unsaturated fatty acids	0.295916	1	2.9	Q9P035	Very-long-chain (3R)-3-hydroxyacyl-CoA dehydratase 3	0.805	Down	0.0084358	HACD3	K10703	43.159	14.841	15.7	4	4	4	0.89	1.022	0.9	1.157	1.185	1.151
hsa05020 Prion disease	0.922414	2	0.5	P62195	26S proteasome regulatory subunit 8	1.204	Up	0.048344	PSMC5	K03066	45.626	43.821	18.2	6	8	6	1.194	1.162	0.997	0.987	0.918	0.88
hsa04666 Fc gamma R-mediated phagocytosis	0.30013	2	1.83	P23528	Cofilin-1	1.215	Up	0.021564	CFL1	K05765	18.502	67.489	25.9	4	6	3	1.192	1.179	1.037	0.883	0.953	0.968
hsa04664 Fc epsilon RI signaling pathway	0.0872513	2	3.99	P62993	Growth factor receptor-bound protein 2	1.308	Up	0.0009616	GRB2	K04364	25.206	7.2899	7.8	2	2	2	1.173	1.134	1.24	0.918	0.874	0.919
hsa01522 Endocrine resistance	0.138439	2	3.04	P62993	Growth factor receptor-bound protein 2	1.308	Up	0.0009616	GRB2	K04364	25.206	7.2899	7.8	2	2	2	1.173	1.134	1.24	0.918	0.874	0.919
hsa05200 Pathways in cancer	0.656488	3	0.9	P62993	Growth factor receptor-bound protein 2	1.308	Up	0.0009616	GRB2	K04364	25.206	7.2899	7.8	2	2	2	1.173	1.134	1.24	0.918	0.874	0.919
hsa04912 GnRH signaling pathway	0.0597055	3	3.3	P62993	Growth factor receptor-bound protein 2	1.308	Up	0.0009616	GRB2	K04364	25.206	7.2899	7.8	2	2	2	1.173	1.134	1.24	0.918	0.874	0.919
hsa05215 Prostate cancer	0.12772	2	3.19	P62993	Growth factor receptor-bound protein 2	1.308	Up	0.0009616	GRB2	K04364	25.206	7.2899	7.8	2	2	2	1.173	1.134	1.24	0.918	0.874	0.919
hsa04917 Prolactin signaling pathway	0.0688335	2	4.56	P62993	Growth factor receptor-bound protein 2	1.308	Up	0.0009616	GRB2	K04364	25.206	7.2899	7.8	2	2	2	1.173	1.134	1.24	0.918	0.874	0.919
hsa00480 Glutathione metabolism	0.630118	1	1.03	P15144	Aminopeptidase N	1.315	Up	0.033803	ANPEP	K11140	109.54	86.401	10.3	7	8	7	1.173	1.138	1.217	1.037	0.769	0.876
hsa00062 Fatty acid elongation	0.0601822	2	4.91	Q16836	Hydroxyacyl-coenzyme A dehydrogenase, mitochondrial	1.329	Up	0.047639	HADH	K00022	34.293	1.4533	7	2	2	2	1.121	1.071	1.346	0.954	0.945	0.764
hsa00071 Fatty acid degradation	0.592426	1	1.14	Q16836	Hydroxyacyl-coenzyme A dehydrogenase, mitochondrial	1.329	Up	0.047639	HADH	K00022	34.293	1.4533	7	2	2	2	1.121	1.071	1.346	0.954	0.945	0.764
hsa04934 Cushing syndrome	0.194493	2	2.46	Q13557	Calcium/calmodulin-dependent protein kinase type II subunit delta	1.361	Up	0.0003971	CAMK2D	K04515	56.369	65.282	6.4	2	2	2	1.179	1.169	1.255	0.908	0.883	0.856
hsa04217 Necroptosis	0.392705	2	1.49	Q13557	Calcium/calmodulin-dependent protein kinase type II subunit delta	1.361	Up	0.0003971	CAMK2D	K04515	56.369	65.282	6.4	2	2	2	1.179	1.169	1.255	0.908	0.883	0.856
hsa04925 Aldosterone synthesis and secretion	0.419103	1	1.88	Q13557	Calcium/calmodulin-dependent protein kinase type II subunit delta	1.361	Up	0.0003971	CAMK2D	K04515	56.369	65.282	6.4	2	2	2	1.179	1.169	1.255	0.908	0.883	0.856
hsa05200 Pathways in cancer	0.656488	3	0.9	Q13557	Calcium/calmodulin-dependent protein kinase type II subunit delta	1.361	Up	0.0003971	CAMK2D	K04515	56.369	65.282	6.4	2	2	2	1.179	1.169	1.255	0.908	0.883	0.856
hsa04912 GnRH signaling pathway	0.0597055	3	3.3	Q13557	Calcium/calmodulin-dependent protein kinase type II subunit delta	1.361	Up	0.0003971	CAMK2D	K04515	56.369	65.282	6.4	2	2	2	1.179	1.169	1.255	0.908	0.883	0.856
hsa04750 Inflammatory mediator regulation of TRP channels	0.455256	1	1.68	Q13557	Calcium/calmodulin-dependent protein kinase type II subunit delta	1.361	Up	0.0003971	CAMK2D	K04515	56.369	65.282	6.4	2	2	2	1.179	1.169	1.255	0.908	0.883	0.856
hsa04960 Aldosterone-regulated sodium reabsorption	0.249412	1	3.55	P28482	Mitogen-activated protein kinase 1	1.65	Up	0.042498	MAPK1	K04371	41.389	15.69	11.9	4	6	2	1.307	1.598	1.086	1.012	0.761	0.646
hsa04934 Cushing syndrome	0.194493	2	2.46	P28482	Mitogen-activated protein kinase 1	1.65	Up	0.042498	MAPK1	K04371	41.389	15.69	11.9	4	6	2	1.307	1.598	1.086	1.012	0.761	0.646
hsa04664 Fc epsilon RI signaling pathway	0.0872513	2	3.99	P28482	Mitogen-activated protein kinase 1	1.65	Up	0.042498	MAPK1	K04371	41.389	15.69	11.9	4	6	2	1.307	1.598	1.086	1.012	0.761	0.646
hsa01522 Endocrine resistance	0.138439	2	3.04	P28482	Mitogen-activated protein kinase 1	1.65	Up	0.042498	MAPK1	K04371	41.389	15.69	11.9	4	6	2	1.307	1.598	1.086	1.012	0.761	0.646
hsa05020 Prion disease	0.922414	2	0.5	P28482	Mitogen-activated protein kinase 1	1.65	Up	0.042498	MAPK1	K04371	41.389	15.69	11.9	4	6	2	1.307	1.598	1.086	1.012	0.761	0.646
hsa04611 Platelet activation	0.794113	1	0.65	P28482	Mitogen-activated protein kinase 1	1.65	Up	0.042498	MAPK1	K04371	41.389	15.69	11.9	4	6	2	1.307	1.598	1.086	1.012	0.761	0.646
hsa05200 Pathways in cancer	0.656488	3	0.9	P28482	Mitogen-activated protein kinase 1	1.65	Up	0.042498	MAPK1	K04371	41.389	15.69	11.9	4	6	2	1.307	1.598	1.086	1.012	0.761	0.646
hsa04723 Retrograde endocannabinoid signaling	0.780197	1	0.68	P28482	Mitogen-activated protein kinase 1	1.65	Up	0.042498	MAPK1	K04371	41.389	15.69	11.9	4	6	2	1.307	1.598	1.086	1.012	0.761	0.646
hsa04912 GnRH signaling pathway	0.0597055	3	3.3	P28482	Mitogen-activated protein kinase 1	1.65	Up	0.042498	MAPK1	K04371	41.389	15.69	11.9	4	6	2	1.307	1.598	1.086	1.012	0.761	0.646
hsa05215 Prostate cancer	0.12772	2	3.19	P28482	Mitogen-activated protein kinase 1	1.65	Up	0.042498	MAPK1	K04371	41.389	15.69	11.9	4	6	2	1.307	1.598	1.086	1.012	0.761	0.646
hsa04730 Long-term depression	0.472495	1	1.6	P28482	Mitogen-activated protein kinase 1	1.65	Up	0.042498	MAPK1	K04371	41.389	15.69	11.9	4	6	2	1.307	1.598	1.086	1.012	0.761	0.646
hsa04270 Vascular smooth muscle contraction	0.685473	1	0.89	P28482	Mitogen-activated protein kinase 1	1.65	Up	0.042498	MAPK1	K04371	41.389	15.69	11.9	4	6	2	1.307	1.598	1.086	1.012	0.761	0.646
hsa04917 Prolactin signaling pathway	0.0688335	2	4.56	P28482	Mitogen-activated protein kinase 1	1.65	Up	0.042498	MAPK1	K04371	41.389	15.69	11.9	4	6	2	1.307	1.598	1.086	1.012	0.761	0.646
hsa04666 Fc gamma R-mediated phagocytosis	0.30013	2	1.83	P28482	Mitogen-activated protein kinase 1	1.65	Up	0.042498	MAPK1	K04371	41.389	15.69	11.9	4	6	2	1.307	1.598	1.086	1.012	0.761	0.646
hsa00020 Citrate cycle (TCA cycle)	0.171661	2	2.66	P53597	Succinate--CoA ligase [ADP/GDP-forming] subunit alpha, mitochondrial	1.695	Up	0.00113548	SUCLG1	K01899	36.249	1.5745	2.6	1	1	1	1.485	1.263	1.248	0.827	0.782	0.749

## Sheet: metabolism
POS
ID	Name	Other_name(Kegg_name)	Formula	Molecular Weight	RT [min]	Kegg_ID	KEGG_pathway	HMDB_ID	Lipidmaps_ID	SuperClass(HMDB)	Class(HMDB)	SubClass(HMDB)	CATEGORY(Lipidmaps)	MAIN_CLASS(Lipidmaps)	SUB_CLASS(Lipidmaps)	mzCloud_Results	mzVault_Results	MassList_Results	m/z	pos_cNF2	pos_cNF1	pos_cNF4	pos_cNF3	pos_cNF6	pos_cNF5	pos_cNF8	pos_cNF7	pos_Ctrl2	pos_Ctrl1	pos_Ctrl4	pos_Ctrl3	pos_Ctrl6	pos_Ctrl5	pos_Ctrl8	pos_Ctrl7	FC	log2FC	Pvalue	ROC	VIP	Up.Down
pos-6.472_347.22101	Corticosterone	Corticosterone; 11beta,21-Dihydroxy-4-pregnene-3,20-dione; Kendall's compound B; Reichstein's substance H	C21 H30 O4	346.214	6.472	cpd:C02140	map00140 Steroid hormone biosynthesis;map01100 Metabolic pathways;map04923 Regulation of lipolysis in adipocytes;map04925 Aldosterone synthesis and secretion;map05020 Prion diseases	HMDB0001547	LMST02030186	Lipids and lipid-like molecules	Steroids and steroid derivatives	Hydroxysteroids	Sterols [ST]	Steroids [ST02]	C21 steroids (gluco/mineralocorticoids, progestogins) and derivatives [ST0203]	Full match	Full match	Full match	347.221	1.16381e+07	1.10878e+07	1.42646e+07	1.35462e+07	1.89668e+07	1.70386e+07	9.50233e+06	7.4966e+06	2.66483e+06	1.90609e+06	6.81014e+06	5.43468e+06	3.40823e+06	3.26187e+06	2.93614e+06	3.05297e+06	3.51285	1.81264	6.4166e-06	1	2.27391	up
pos-6.211_363.2157	Cortisol	Cortisol; Hydrocortisone; 11beta,17alpha,21-Trihydroxy-4-pregnene-3,20-dione; Kendall's compound F; Reichstein's substance M	C21 H30 O5	362.209	6.211	cpd:C00735	map00140 Steroid hormone biosynthesis;map01100 Metabolic pathways;map04080 Neuroactive ligand-receptor interaction;map04927 Cortisol synthesis and secretion;map04934 Cushing's syndrome;map04960 Aldosterone-regulated sodium reabsorption;map04976 Bile secretion;map05200 Pathways in cancer;map05215 Prostate cancer	HMDB0000063	LMST02030001	Lipids and lipid-like molecules	Steroids and steroid derivatives	Hydroxysteroids	Sterols [ST]	Steroids [ST02]	C21 steroids (gluco/mineralocorticoids, progestogins) and derivatives [ST0203]	Full match	Full match	Full match	363.216	7.49163e+07	7.53172e+07	1.02121e+08	8.99321e+07	8.53886e+07	7.70721e+07	1.00938e+08	1.0317e+08	2.24301e+07	1.92939e+07	8.75284e+07	8.41718e+07	2.91104e+07	2.9657e+07	3.5978e+07	4.0715e+07	2.03178	1.02274	0.0033581	0.890625	1.91006	up
pos-6.096_361.20026	Cortisone	Cortisone; 17alpha,21-Dihydroxy-4-pregnene-3,11,20-trione; Kendall's compound E; Reichstein's substance Fa	C21 H28 O5	360.193	6.096	cpd:C00762	map00140 Steroid hormone biosynthesis;map01100 Metabolic pathways;map04960 Aldosterone-regulated sodium reabsorption;map05200 Pathways in cancer;map05215 Prostate cancer	HMDB0002802	LMST02030090	Lipids and lipid-like molecules	Steroids and steroid derivatives	Hydroxysteroids	Sterols [ST]	Steroids [ST02]	C21 steroids (gluco/mineralocorticoids, progestogins) and derivatives [ST0203]	Full match	Full match	No results	361.2	1.04314e+07	1.02397e+07	1.64919e+07	1.48507e+07	1.13857e+07	1.12621e+07	1.75039e+07	1.76651e+07	6.62797e+06	6.10896e+06	1.18568e+07	1.16933e+07	6.43217e+06	6.80086e+06	1.09844e+07	1.19469e+07	1.51592	0.600193	0.00808733	0.78125	1.64797	up
pos-1.378_114.06615	Creatinine	Creatinine; 1-Methylglycocyamidine	C4 H7 N3 O	113.059	1.378	cpd:C00791	map00330 Arginine and proline metabolism;map01100 Metabolic pathways	HMDB0000562	--	Organic acids and derivatives	Carboxylic acids and derivatives	Amino acids, peptides, and analogues	--	--	--	Full match	Full match	Full match	114.066	6.03377e+07	1.14905e+08	7.86198e+07	4.26472e+07	1.0034e+08	5.73434e+07	1.07339e+08	1.17084e+08	1.26853e+08	1.20475e+08	1.2777e+08	1.29946e+08	1.66675e+08	1.59671e+08	9.51464e+07	1.15162e+08	0.651451	-0.618271	0.00950213	0.921875	1.66073	down
pos-6.712_287.19989	Androstenedione	Androstenedione; Androst-4-ene-3,17-dione; 4-Androstene-3,17-dione	C19 H26 O2	286.193	6.712	cpd:C00280	map00140 Steroid hormone biosynthesis;map01100 Metabolic pathways;map01522 Endocrine resistance;map04913 Ovarian steroidogenesis;map04917 Prolactin signaling pathway;map05200 Pathways in cancer;map05215 Prostate cancer	HMDB0000053	LMST02020007	Lipids and lipid-like molecules	Steroids and steroid derivatives	Androstane steroids	Sterols [ST]	Steroids [ST02]	C19 steroids (androgens) and derivatives [ST0202]	Full match	Full match	Full match	287.2	1.92267e+06	1.81426e+06	1.86605e+06	1.72938e+06	1.55325e+06	1.53599e+06	4.77555e+06	4.12964e+06	1.27815e+06	1.08589e+06	1.09606e+06	1.07548e+06	1.10957e+06	1.37676e+06	1.5304e+06	1.72402e+06	1.88071	0.911279	0.0100112	0.96875	1.67034	up
NEG
ID	Name	Other_name(Kegg_name)	Formula	Molecular Weight	RT [min]	Kegg_ID	KEGG_pathway	HMDB_ID	Lipidmaps_ID	SuperClass(HMDB)	Class(HMDB)	SubClass(HMDB)	CATEGORY(Lipidmaps)	MAIN_CLASS(Lipidmaps)	SUB_CLASS(Lipidmaps)	mzCloud_Results	mzVault_Results	MassList_Results	m/z	neg_cNF2	neg_cNF1	neg_cNF4	neg_cNF3	neg_cNF6	neg_cNF5	neg_cNF8	neg_cNF7	neg_Ctrl2	neg_Ctrl1	neg_Ctrl4	neg_Ctrl3	neg_Ctrl6	neg_Ctrl5	neg_Ctrl8	neg_Ctrl7	FC	log2FC	Pvalue	ROC	VIP	Up.Down
neg-10.206_255.2326	Palmitic acid	Hexadecanoic acid; Hexadecanoate; Hexadecylic acid; Palmitic acid; Palmitate; Cetylic acid	C16 H32 O2	256.24	10.206	cpd:C00249	map00061 Fatty acid biosynthesis;map00062 Fatty acid elongation;map00071 Fatty acid degradation;map01040 Biosynthesis of unsaturated fatty acids;map01100 Metabolic pathways;map01212 Fatty acid metabolism	HMDB0000220	LMFA01010001	Lipids and lipid-like molecules	Fatty Acyls	Fatty acids and conjugates	Fatty Acyls [FA]	Fatty Acids and Conjugates [FA01]	Straight chain fatty acids [FA0101]	Full match	No results	No results	255.233	5.40051e+08	5.2178e+08	4.8074e+08	4.75564e+08	4.15812e+08	4.50056e+08	6.73074e+08	6.57983e+08	2.39908e+08	2.41361e+08	2.14583e+08	2.15784e+08	2.72874e+08	3.2854e+08	1.34613e+08	1.19362e+08	2.3854	1.25423	4.84837e-05	1	1.82671	up
neg-9.69_327.23236	Docosahexaenoic acid	(4Z,7Z,10Z,13Z,16Z,19Z)-Docosahexaenoic acid; 4,7,10,13,16,19-Docosahexaenoic acid; Docosahexaenoic acid; Docosahexaenoate	C22 H32 O2	328.24	9.69	cpd:C06429	map01040 Biosynthesis of unsaturated fatty acids	HMDB0002183	LMFA01031176	Lipids and lipid-like molecules	Fatty Acyls	Fatty acids and conjugates	Fatty Acyls [FA]	Fatty Acids and Conjugates [FA01]	Unsaturated fatty acids [FA0103]	Full match	Full match	No results	327.232	3.89687e+08	3.98057e+08	3.92763e+08	3.15998e+08	3.05249e+08	3.10731e+08	2.51144e+08	2.71758e+08	1.73096e+08	1.71089e+08	2.28941e+08	2.25301e+08	2.07647e+08	2.78982e+08	1.60957e+08	1.49692e+08	1.65155	0.72382	0.000146475	0.96875	1.69913	up
neg-9.752_303.23245	Arachidonic acid	Arachidonate; Arachidonic acid; (5Z,8Z,11Z,14Z)-Icosatetraenoic acid; cis-5,8,11,14-Eicosatetraenoic acid	C20 H32 O2	304.24	9.752	cpd:C00219	map00590 Arachidonic acid metabolism;map00591 Linoleic acid metabolism;map01040 Biosynthesis of unsaturated fatty acids;map01100 Metabolic pathways;map04216 Ferroptosis;map04217 Necroptosis;map04270 Vascular smooth muscle contraction;map04611 Platelet activation;map04664 Fc epsilon RI signaling pathway;map04666 Fc gamma R-mediated phagocytosis;map04723 Retrograde endocannabinoid signaling;map0472…	HMDB0001043	LMFA01030001	Lipids and lipid-like molecules	Fatty Acyls	Fatty acids and conjugates	Fatty Acyls [FA]	Fatty Acids and Conjugates [FA01]	Unsaturated fatty acids [FA0103]	Full match	Full match	Full match	303.232	4.02235e+08	4.17118e+08	5.59551e+08	4.32762e+08	4.86442e+08	4.66874e+08	4.23635e+08	4.30593e+08	2.56622e+08	2.23934e+08	1.74485e+08	1.61942e+08	3.14407e+08	3.75376e+08	1.96752e+08	1.92133e+08	1.90922	0.932981	0.000182528	1	1.787	up
neg-10.414_331.26373	Adrenic acid	7,10,13,16-Docosatetraenoic acid; (7Z,10Z,13Z,16Z)-Docosa-7,10,13,16-tetraenoic acid; Adrenic acid	C22 H36 O2	332.271	10.414	cpd:C16527	map01040 Biosynthesis of unsaturated fatty acids;map04216 Ferroptosis	HMDB0002226	LMFA04000050	Lipids and lipid-like molecules	Fatty Acyls	Fatty acids and conjugates	Fatty Acyls [FA]	Docosanoids [FA04]	_	Full match	Full match	No results	331.264	4.61339e+07	4.91808e+07	6.64632e+07	5.78763e+07	5.16498e+07	5.28043e+07	6.02154e+07	6.29197e+07	2.65409e+07	2.48987e+07	1.58041e+07	1.5002e+07	3.71731e+07	4.14441e+07	1.69671e+07	1.59975e+07	2.30743	1.20629	0.000264684	1	1.77924	up
neg-11.053_283.26367	Stearic acid	Octadecanoic acid; Stearate; Stearic acid	C18 H36 O2	284.271	11.053	cpd:C01530	map00061 Fatty acid biosynthesis;map01040 Biosynthesis of unsaturated fatty acids	HMDB0000827	LMFA01010018	Lipids and lipid-like molecules	Fatty Acyls	Fatty acids and conjugates	Fatty Acyls [FA]	Fatty Acids and Conjugates [FA01]	Straight chain fatty acids [FA0101]	Full match	No results	Full match	283.264	4.52321e+08	4.90566e+08	3.77411e+08	3.12649e+08	3.81277e+08	3.62657e+08	4.37825e+08	4.40104e+08	2.34171e+08	2.53702e+08	1.76074e+08	1.47848e+08	2.04961e+08	2.17069e+08	9.29728e+07	8.84295e+07	2.29985	1.20154	0.000283497	1	1.75865	up
neg-1.457_133.01389	L-Malate	(S)-Malate; L-Malate; L-Apple acid; L-Malic acid; L-2-Hydroxybutanedioic acid; Malate; Malic acid	C4 H6 O5	134.021	1.457	cpd:C00149	map00020 Citrate cycle (TCA cycle);map00620 Pyruvate metabolism;map00630 Glyoxylate and dicarboxylate metabolism;map01100 Metabolic pathways;map01200 Carbon metabolism	HMDB0000156	--	Organic acids and derivatives	Hydroxy acids and derivatives	Beta hydroxy acids and derivatives	--	--	--	No results	No results	Full match	133.014	2.17172e+07	2.13223e+07	3.22195e+07	2.99078e+07	1.45997e+07	1.26873e+07	2.50593e+07	2.03691e+07	8.34919e+06	6.67506e+06	1.20728e+07	1.60727e+07	1.31473e+07	1.41483e+07	1.06333e+07	1.0584e+07	1.94019	0.956201	0.000776039	0.9375	1.57507	up
neg-2.142_191.01942	Citric acid	Citrate; Citric acid; 2-Hydroxy-1,2,3-propanetricarboxylic acid; 2-Hydroxytricarballylic acid	C6 H8 O7	192.027	2.142	cpd:C00158	map00020 Citrate cycle (TCA cycle);map00250 Alanine, aspartate and glutamate metabolism;map00630 Glyoxylate and dicarboxylate metabolism;map01100 Metabolic pathways;map01200 Carbon metabolism;map01210 2-Oxocarboxylic acid metabolism;map01230 Biosynthesis of amino acids	HMDB0000094	--	Organic acids and derivatives	Carboxylic acids and derivatives	Tricarboxylic acids and derivatives	--	--	--	Full match	Full match	Full match	191.019	7.50761e+08	8.18822e+08	7.18898e+08	5.78612e+08	9.50232e+08	9.15351e+08	4.56584e+08	4.97943e+08	5.54594e+08	5.30001e+08	4.93781e+08	4.91977e+08	4.07314e+08	3.51783e+08	3.92658e+08	3.14243e+08	1.60821	0.685457	0.00219938	0.90625	1.51143	up
neg-1.483_173.00861	Dehydroascorbic acid	Dehydroascorbate; Dehydroascorbic acid; L-Dehydroascorbate; L-Dehydroascorbic acid	C6 H6 O6	174.016	1.483	cpd:C05422	map00053 Ascorbate and aldarate metabolism;map00480 Glutathione metabolism;map01100 Metabolic pathways	HMDB0001264	--	Organoheterocyclic compounds	Lactones	Gamma butyrolactones	--	--	--	No results	Full match	Full match	173.009	1.71833e+07	1.53111e+07	1.92989e+07	1.50905e+07	1.72989e+07	1.26796e+07	1.45613e+07	1.3111e+07	9.00684e+06	5.00401e+06	1.33444e+07	1.22467e+07	8.54704e+06	1.17512e+07	1.04131e+07	1.0707e+07	1.53708	0.620192	0.00354005	0.96875	1.49352	up
neg-9.311_301.21671	Eicosapentaenoic acid	(5Z,8Z,11Z,14Z,17Z)-Icosapentaenoic acid; (5Z,8Z,11Z,14Z,17Z)-Eicosapentaenoic acid; Eicosapentaenoic acid; 5,8,11,14,17-Icosapentaenoic acid; (5Z,8Z,11Z,14Z,17Z)-Eicosapentaenoate	C20 H30 O2	302.224	9.311	cpd:C06428	map01040 Biosynthesis of unsaturated fatty acids	HMDB0001999	--	Lipids and lipid-like molecules	Fatty Acyls	Fatty acids and conjugates	--	--	--	No results	Full match	Full match	301.217	1.76028e+07	1.65251e+07	2.29393e+07	1.9962e+07	2.76053e+07	2.50201e+07	2.13268e+07	2.35635e+07	7.39574e+06	7.20015e+06	1.53668e+07	1.70021e+07	1.78947e+07	1.80694e+07	8.4196e+06	8.23613e+06	1.75273	0.809602	0.00365291	0.921875	1.50339	up
neg-10.871_365.34183	Nervonic acid	(15Z)-Tetracosenoic acid; Nervonic acid; (Z)-15-Tetracosenoic acid	C24 H46 O2	366.349	10.871	cpd:C08323	map01040 Biosynthesis of unsaturated fatty acids	HMDB0002368	LMFA01030092	Lipids and lipid-like molecules	Fatty Acyls	Fatty acids and conjugates	Fatty Acyls [FA]	Fatty Acids and Conjugates [FA01]	Unsaturated fatty acids [FA0103]	No results	No results	Full match	365.342	5.17916e+06	4.41099e+06	3.93307e+06	6.44413e+06	3.5724e+06	7.20604e+06	7.18749e+06	7.58569e+06	4.81706e+06	3.61625e+06	2.70116e+06	3.05218e+06	4.66995e+06	4.14851e+06	3.80077e+06	2.08023e+06	1.57581	0.656091	0.00817599	0.84375	1.33947	up
neg-1.308_124.0073	Taurine	Taurine; 2-Aminoethanesulfonic acid; Aminoethylsulfonic acid	C2 H7 N O3 S	125.015	1.308	cpd:C00245	map00120 Primary bile acid biosynthesis;map00430 Taurine and hypotaurine metabolism;map00920 Sulfur metabolism;map01100 Metabolic pathways;map02010 ABC transporters;map04080 Neuroactive ligand-receptor interaction	HMDB0000251	--	Organic acids and derivatives	Organic sulfonic acids and derivatives	Organosulfonic acids and derivatives	--	--	--	No results	Full match	Full match	124.007	4.05558e+06	5.04697e+06	8.99692e+06	6.82959e+06	4.31587e+06	5.10511e+06	1.54913e+07	1.32886e+07	5.36483e+06	4.48204e+06	4.95554e+06	4.35286e+06	3.39353e+06	4.08409e+06	2.68678e+06	2.74998e+06	1.96852	0.977115	0.0159928	0.828125	1.28286	up
neg-11.855_311.29535	Arachidic Acid	Icosanoic acid; Eicosanoic acid; Arachidic acid	C20 H40 O2	312.302	11.855	cpd:C06425	map01040 Biosynthesis of unsaturated fatty acids	HMDB0002212	LMFA01010020	Lipids and lipid-like molecules	Fatty Acyls	Fatty acids and conjugates	Fatty Acyls [FA]	Fatty Acids and Conjugates [FA01]	Straight chain fatty acids [FA0101]	Full match	No results	Full match	311.295	1.00459e+07	6.43197e+06	6.92754e+06	9.15265e+06	5.61533e+06	5.77513e+06	1.13569e+07	5.9625e+06	9.87056e+06	3.59944e+06	5.74964e+06	7.97849e+06	2.92297e+06	3.96722e+06	3.94189e+06	2.11037e+06	1.52633	0.61007	0.032491	0.8125	1.14841	up
